# Supplementary material for: Genome wide identification of BjSWEET gene family and drought response analysis of BjSWEET12 and BjSWEET17 genes in Brassica juncea
Source: PubMed Central journal article supplement (PMC11575039; doi:10.1186/s12870-024-05815-w), 2024-11-19
Supplement: 12870_2024_5815_MOESM2_ESM.pdf [file 12870_2024_5815_MOESM2_ESM.pdf]

Motif4

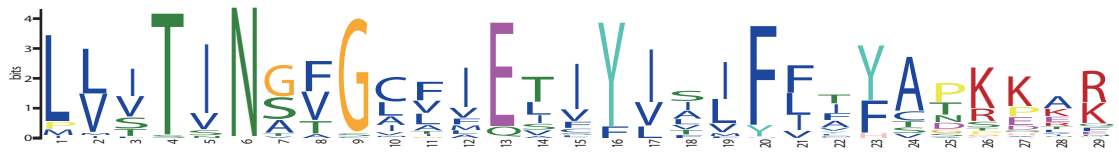

Motif5

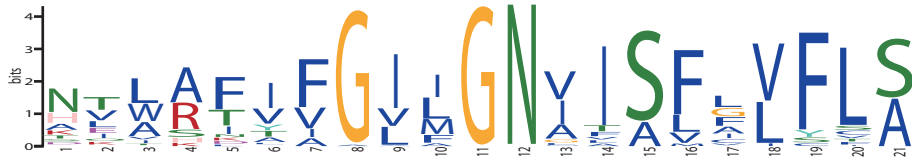

Motif9

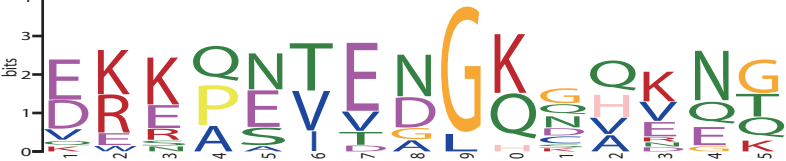

Motif10

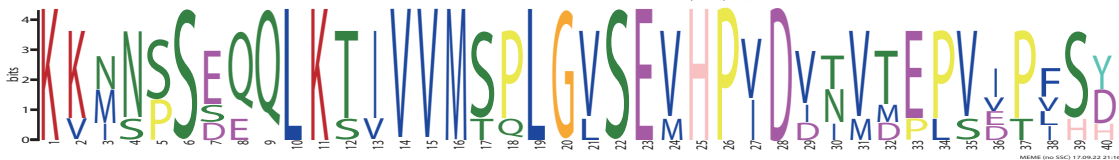

MEME (no SSC) 17.09.22 21:16

MEME (no SSC) 17.09.22 21:16
