# Supplementary material for: Genome wide identification of BjSWEET gene family and drought response analysis of BjSWEET12 and BjSWEET17 genes in Brassica juncea
Source: PubMed Central journal article supplement (PMC11575039; doi:10.1186/s12870-024-05815-w), 2024-11-19

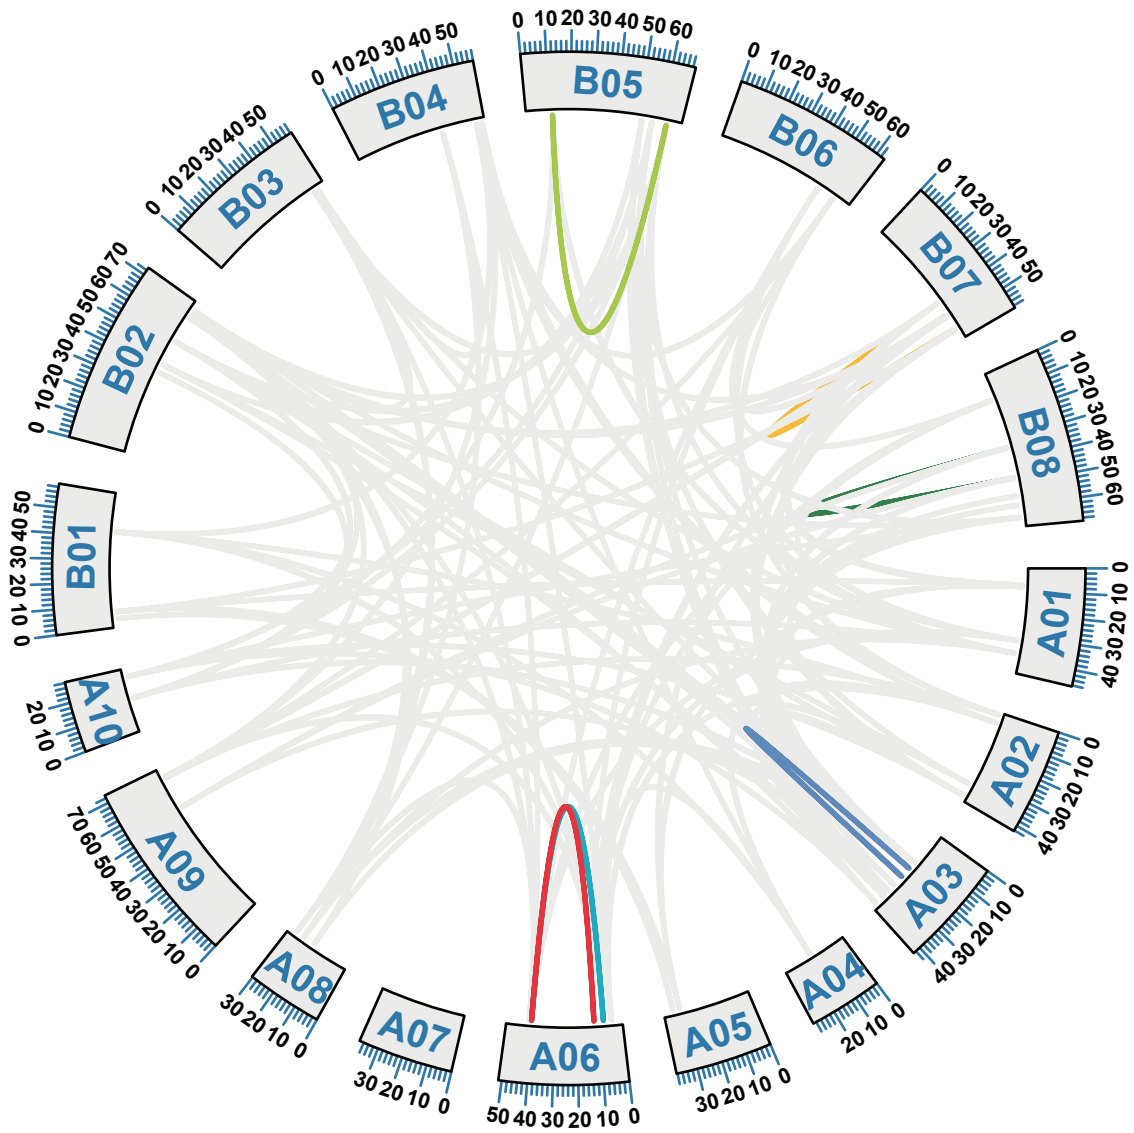

Supplement: 12870_2024_5815_MOESM3_ESM.pdf [file 12870_2024_5815_MOESM3_ESM.pdf]
